# Supplementary material for: Functions of thga1 Gene in Trichoderma harzianum Based on Transcriptome Analysis
Source: Biomed Res Int. 2016 Sep 8;2016:8329513. doi: 10.1155/2016/8329513 (PMC5031823; doi:10.1155/2016/8329513)
Supplement: Supplementary file 1 — The supplementary material contains: list of Trichoderma harzianum genes with significantly altered expression (S1 Table), primers used in validation experiments (S2 Table), summary of differentially expressed genes (DEGs) assigned to the KEGG database (S3 Table), number of DEGs assigned to GO classification (S4 Table), number of DEGs assigned to KOG function classification (S5 Table), DEGs coding for carbohydrate activity enzymes, arranged by family (S6 Table), genes coding for transcription factors, arranged by family (S7 Table), DEGs involved in secondary metabolite biosynthesis, transport, and catabolism (S8 Table). All these documents are in .xls format. [file 8329513.f1.xls]

## Sheet: S1 Table
The 20 most up-regulated genes
gene_id	th_33_FPKM	1_1_FPKM	log2(fold_change) (1_1_VS_th_33)	annotation
Tha_00605	3.03445	1116.45	8.52327	conserved hypothetical protein
Tha_07003	1.40876	505.179	8.48623	DSBA oxidoreductase
Tha_06752	1.47889	525.315	8.47252	NADPH-dependent 1-acyl dihydroxyacetone phosphate reductase, putative
Tha_02648	2.5242	876.206	8.4393	NmrA-like family protein
Tha_09103	0.858313	273.353	8.31505	SET domain protein
Tha_05889	4.379	1191.36	8.08779	putative bzip transcription factor protein
Tha_04521	1.14529	200.587	7.45237	MFS multidrug transporter, putative
Tha_05402	3.76572	601.201	7.31878	probable oxidoreductase CipA-like
Tha_05442	1.44815	227.111	7.29304	related to interferon-regulated resistance GTP-binding protein
Tha_02841	7.37906	1086.85	7.2025	dienelactone hydrolase family protein
Tha_02939	9.3255	1332.55	7.15879	hypothetical protein TRIVIDRAFT_219615
Tha_00626	1.33597	173.731	7.02282	ubiquitin conjugating enzyme, putative
Tha_09569	12.2768	1577.64	7.00569	efflux pump antibiotic resistance protein, putative
Tha_10182	13.0102	1499.39	6.84859	conserved hypothetical protein
Tha_08643	25.514	2919.08	6.83808	aldolase citrate lyase family protein
Tha_09568	0.407647	42.8822	6.71691	hypothetical protein TRIVIDRAFT_112473, partial
Tha_00606	78.0813	7936.96	6.66747	c6 zinc finger domain containing protein
Tha_07274	1.6043	143.7	6.48497	beta-lactamase, putative
Tha_02055	4.34383	359.718	6.37175	glycoside hydrolase family 93 protein
Tha_00613	8.61265	702.636	6.35018	putative polyketide synthase protein
The 20 most down-regulated genes
gene_id	th_33_FPKM	1_1_FPKM	log2(fold_change) (1_1_VS_th_33)	annotation
Tha_02933	960.636	3.21889	-8.22128	putative nad dependent epimerase protein
Tha_06614	2806.51	15.3626	-7.51321	MFS transporter
Tha_07463	241.974	1.65487	-7.19199	integral membrane protein
Tha_06257	255.685	1.97891	-7.01352	sphingomyelin phosphodiesterase
Tha_03142	434.286	3.66923	-6.88702	small oligopeptide opt family
Tha_07330	131.855	1.21924	-6.75683	Gamma-glutamyltranspeptidase-like protein
Tha_08636	283.784	2.64226	-6.74688	hypothetical protein TRIVIDRAFT_228067
Tha_04343	214.815	2.01663	-6.73501	fungalysin metallopeptidase
Tha_06001	152.309	1.61959	-6.55523	FAD dependent oxidoreductase, putative
Tha_06703	554.095	6.30837	-6.45672	hypothetical protein TRIVIDRAFT_68301
Tha_07300	163.651	1.91055	-6.42049	peptide transporter
Tha_06613	785.444	11.3096	-6.11789	fungal specific transcription factor
Tha_03788	468.471	6.78884	-6.10865	copper amine oxidase
Tha_07411	61.3816	0.910982	-6.07424	hypothetical protein TRIVIDRAFT_58266
Tha_04442	172.276	2.69379	-5.99894	formamidase-like protein
Tha_00681	537.519	8.51879	-5.97952	amino acid transporter-like protein
Tha_06353	208.639	3.35232	-5.95971	hypothetical protein TRIVIDRAFT_35703
Tha_09705	64.1374	1.0426	-5.94291	hypothetical protein TRIVIDRAFT_188606
Tha_00842	651.053	10.8959	-5.90092	predicted protein
Tha_07689	129.142	2.25615	-5.83895	serin endopeptidase

## Sheet: S2 Table
Gene_ID		Primer(Forward,5'-3')	Primer(Reverse,5'-3')	annotation
1	Tha_08070	TGTGGCACACATCCCATGAC	GTGCGGCCTAGTTGTGAGGA	fungal specific transcription factor
2	Tha_05971	GGCCTGTCATCCTCACATGG	TTGAAGCATTCGGATCTCGG	hypothetical protein TRIATDRAFT_88691
3	Tha_10374	AGTCAACCTGAACTCGGCCA	CGAGTCGGAAAATAATGCGC	putative rta1 domain protein
4	Tha_02154	GATCACCGACTGGAGAGCGA	GTCGACGTGCTTCCACAGCT	RNA exonuclease 3
5	Tha_10000	GGTGACTACGGTGATGCGCT	GCCGCTCCCATAGGTACCAT	Zn(2)-C6 fungal-type DNA-binding domain protein
6	Tha_02973	GTAACCTTTCGCGCCGAGTT	ACTGAGAGCCAAGCCAGCCT	ABC transporter, transmembrane domain, type 1
7	Tha_10350	TGGTTCGCTTGTCTGTTGCC	GCACTCGCCGCCAATAAATT	biotrophy-associated secreted protein 2
8	Tha_10266	ACCCCGTATCTCCCAAGTCG	CGTCCAGTGATAGCTCCCCA	cyclic AMP phosphodiesterase, class II
9	Tha_05677	CGCGAAGATGCATGTCACAC	GCCTATCGTCAAGCCCCATT	cytochrome P450
10	Tha_06613	TGTGGTGCAGAAGCGTTTGA	CCTGTGCCGCTCCAATACAC	fungal specific transcription factor
11	Tha_06513	TCAAGGAGAAGCTGCCGGTC	TCGTGCTGGTTCAGGCTGAC	G protein alpha subunit
12	Tha_08164	TGTTGCAAAGTCATCGAGCG	CGAAACTGTCGTTACGCCGT	GPCR, PTH11-type
13	Tha_05810	CCCGATGCTTCCTGGAATCT	GGACCTTGGAGGACGTGGTT	GPCR, PTH11-type
14	Tha_09027	GCTGACGGCTACGTACCGAA	TGATCTCTGGCCACCGACAT	G-protein alpha subunit TgaB
15	Tha_07463	ATTCCCACCCTCGGACCTTT	CTCCTGCTGTCAGCCTTGGA	integral membrane protein
16	Tha_00988	GAGATGCCCGATGGCTACAA	TGGTCTGAGCCTTGGTGAGG	actin
17	Tha_09020	TCCCAACAACATCCAAACCG	GAATTGCTCACCAACACGGC	beta-tubulin
18	Tha_00637	GAGGCACAAAGGACGAGCTG	GCCATCGAGAGCCACAAGAA	transcription elongation factor
19	Tha_03216	GTGGCGGCAGCACTTGTTAT	ATGACGAACGAAAAGCACCG	ubiquitin-conjugating enzyme

## Sheet: S3 Table
#ID	name	m/n	p-value	q-value	gene-list
ko00591	Linoleic acid metabolism	19/318	0.000577936	0.10634	Tha_03926;Tha_08015;Tha_05988;Tha_00727;Tha_00693;Tha_02213;Tha_10126;Tha_06017;Tha_06735;Tha_09914;Tha_10053;Tha_06102;Tha_03478;Tha_10043;Tha_06752;Tha_02605;Tha_07464;Tha_04300;Tha_05035;
ko00460	Cyanoamino acid metabolism	13/318	0.00170237	0.156618	Tha_10297;Tha_05387;Tha_02338;Tha_04382;Tha_02093;Tha_07111;Tha_03413;Tha_10074;Tha_09761;Tha_07330;Tha_02625;Tha_10365;Tha_04284;
ko00480	Glutathione metabolism	11/318	0.00296991	0.182155	Tha_01096;Tha_07923;Tha_02429;Tha_10817;Tha_05885;Tha_06612;Tha_04626;Tha_06803;Tha_05984;Tha_02713;Tha_10346;
ko00625	Chloroalkane and chloroalkene degradation	25/318	0.0030353	0.139624	Tha_03926;Tha_08015;Tha_05988;Tha_07348;Tha_05862;Tha_00727;Tha_02213;Tha_10126;Tha_06017;Tha_07361;Tha_06735;Tha_09914;Tha_05169;Tha_08729;Tha_10053;Tha_06102;Tha_03478;Tha_05888;Tha_06752;Tha_00697;Tha_02605;Tha_07464;Tha_04300;Tha_07466;Tha_05035;
ko00380	Tryptophan metabolism	17/318	0.0034904	0.128447	Tha_04582;Tha_08314;Tha_01745;Tha_04583;Tha_02338;Tha_05862;Tha_04039;Tha_07361;Tha_00576;Tha_04284;Tha_02242;Tha_02093;Tha_10536;Tha_09435;Tha_03413;Tha_02625;Tha_03241;
ko00650	Butanoate metabolism	22/318	0.00375966	0.115296	Tha_03926;Tha_08015;Tha_01745;Tha_05988;Tha_07277;Tha_00727;Tha_02213;Tha_10126;Tha_06017;Tha_06735;Tha_10754;Tha_09931;Tha_09914;Tha_10053;Tha_06102;Tha_03478;Tha_06752;Tha_02605;Tha_07464;Tha_04300;Tha_06349;Tha_05035;
ko00363	Bisphenol degradation	27/318	0.00479153	0.125949	Tha_03926;Tha_05988;Tha_00727;Tha_02213;Tha_02280;Tha_01095;Tha_03478;Tha_06752;Tha_06969;Tha_07464;Tha_05035;Tha_07466;Tha_08015;Tha_08483;Tha_05809;Tha_10126;Tha_05808;Tha_01865;Tha_06017;Tha_06735;Tha_09914;Tha_10053;Tha_06102;Tha_02605;Tha_04300;Tha_05677;Tha_06349;
ko00100	Steroid biosynthesis	7/318	0.00709715	0.163234	Tha_07106;Tha_00493;Tha_08298;Tha_09752;Tha_04257;Tha_02261;Tha_10349;
ko00360	Phenylalanine metabolism	12/318	0.00911535	0.186358	Tha_04283;Tha_00716;Tha_03788;Tha_02337;Tha_03374;Tha_02338;Tha_02093;Tha_04039;Tha_03413;Tha_04221;Tha_06000;Tha_04284;
ko00910	Nitrogen metabolism	8/318	0.00924784	0.17016	Tha_02947;Tha_04382;Tha_04442;Tha_10342;Tha_04463;Tha_09669;Tha_02625;Tha_02946;
ko00590	Arachidonic acid metabolism	7/318	0.0167355	0.279939	Tha_05169;Tha_05387;Tha_07348;Tha_08235;Tha_06778;Tha_07330;Tha_10365;
ko00909	Sesquiterpenoid biosynthesis	3/318	0.0197578	0.302954	Tha_03319;Tha_05807;Tha_10347;
ko00627	Aminobenzoate degradation	27/318	0.0220154	0.311602	Tha_08314;Tha_02338;Tha_02310;Tha_03283;Tha_00693;Tha_01344;Tha_06227;Tha_02280;Tha_01095;Tha_02093;Tha_10043;Tha_09435;Tha_03413;Tha_10448;Tha_06969;Tha_07466;Tha_01745;Tha_08483;Tha_05809;Tha_06350;Tha_05808;Tha_01865;Tha_04284;Tha_01224;Tha_02829;Tha_02625;Tha_05677;
ko00982	Drug metabolism - cytochrome P450	16/318	0.0268824	0.353311	Tha_07923;Tha_02337;Tha_02429;Tha_04231;Tha_00693;Tha_05885;Tha_00758;Tha_04626;Tha_05168;Tha_10043;Tha_10817;Tha_00697;Tha_06160;Tha_06000;Tha_05984;Tha_10346;
ko00940	Phenylpropanoid biosynthesis	11/318	0.0274072	0.336195	Tha_10297;Tha_00003;Tha_00716;Tha_02619;Tha_06180;Tha_05509;Tha_02933;Tha_04221;Tha_10687;Tha_10532;Tha_02305;
ko00720	Carbon fixation pathways in prokaryotes	5/318	0.0411245	0.472932	Tha_01096;Tha_00614;Tha_08778;Tha_02713;Tha_03241;
ko00630	Glyoxylate and dicarboxylate metabolism	7/318	0.0420664	0.455307	Tha_08778;Tha_02598;Tha_04513;Tha_09616;Tha_04442;Tha_01814;Tha_03241;
ko00310	Lysine degradation	11/318	0.0453181	0.463251	Tha_01745;Tha_03375;Tha_05805;Tha_05862;Tha_04346;Tha_06401;Tha_07361;Tha_03560;Tha_03241;Tha_02572;Tha_00047;
ko04964	Proximal tubule bicarbonate reclamation	2/318	0.0520925	0.49154	Tha_08147;Tha_07052;
ko04080	Neuroactive ligand-receptor interaction	2/318	0.0520925	0.49154	Tha_08535;Tha_07689;
ko00051	Fructose and mannose metabolism	17/318	0.0551849	0.483525	Tha_03926;Tha_08015;Tha_05988;Tha_00727;Tha_02213;Tha_10126;Tha_06017;Tha_06735;Tha_09914;Tha_10053;Tha_06102;Tha_03478;Tha_06752;Tha_02605;Tha_07464;Tha_04300;Tha_05035;
ko04146	Peroxisome	14/318	0.0557242	0.466057	Tha_09314;Tha_07348;Tha_06614;Tha_02630;Tha_10750;Tha_04813;Tha_06400;Tha_02713;Tha_01096;Tha_05169;Tha_09882;Tha_05551;Tha_07411;Tha_05922;
ko04320	Dorso-ventral axis formation	2/318	0.0741682	0.593345	Tha_00196;Tha_02601;
ko04972	Pancreatic secretion	4/318	0.0763051	0.585006	Tha_08535;Tha_06955;Tha_07689;Tha_07052;

## Sheet: S4 Table
GO Term ID	Gene Ontology term	DEGs with GO annotation
GO:0045735	nutrient reservoir activity	1
GO:0051704	multi-organism process	1
GO:0044699	single-organism process	115
GO:0003824	catalytic activity	351
GO:0005198	structural molecule activity	1
GO:0065007	biological regulation	33
GO:0005215	transporter activity	54
GO:0005623	cell	48
GO:0060089	molecular transducer activity	3
GO:0043226	organelle	27
GO:0032991	macromolecular complex	7
GO:0005488	binding	191
GO:0071840	cellular component organization or biogenesis	10
GO:0051179	localization	100
GO:0001071	nucleic acid binding transcription factor activity	14
GO:0050896	response to stimulus	11
GO:0009987	cellular process	201
GO:0023052	signaling	5
GO:0009055	electron carrier activity	21
GO:0016020	membrane	124
GO:0008152	metabolic process	381
GO:0031974	membrane-enclosed lumen	1
GO:0016209	antioxidant activity	3
GO:0044425	membrane part	100
GO:0044422	organelle part	9
GO:0044421	extracellular region part	1
GO:0051234	establishment of localization	99
GO:0004872	receptor activity	1
GO:0030234	enzyme regulator activity	6
GO:0005576	extracellular region	6
GO:0044464	cell part	48

## Sheet: S5 Table
Function Class	Number	Genes
J:Translation; Ribosomal structure and biogenesis	7	Tha_02093;Tha_02338;Tha_02952;Tha_03413;Tha_04284;Tha_07083;Tha_07962;
A:RNA processing and modification	5	Tha_03124;Tha_03378;Tha_03577;Tha_09561;Tha_10380;
K:Transcription	18	Tha_00391;Tha_01156;Tha_01636;Tha_01888;Tha_02013;Tha_02693;Tha_03728;Tha_04707;Tha_05054;Tha_05270;Tha_05386;Tha_05507;Tha_05578;Tha_06546;Tha_06583;Tha_08707;Tha_09131;Tha_09723;
L:DNA Replication; recombination and repair	12	Tha_01120;Tha_01706;Tha_02154;Tha_02350;Tha_02693;Tha_03124;Tha_03577;Tha_05386;Tha_06546;Tha_06583;Tha_09561;Tha_09723;
B:Chromatin structure and dynamics	2	Tha_01416;Tha_09103;
D:Cell cycle control; cell division; chromosome partitioning	6	Tha_00965;Tha_01013;Tha_06513;Tha_08365;Tha_09027;Tha_09892;
V:Denfense Mechanisms	12	Tha_00003;Tha_02305;Tha_02619;Tha_02933;Tha_03353;Tha_05509;Tha_06180;Tha_07878;Tha_07988;Tha_10126;Tha_10532;Tha_10687;
T:Signal transduction mechanisms	32	Tha_00070;Tha_00196;Tha_00493;Tha_00530;Tha_01324;Tha_01601;Tha_01642;Tha_02093;Tha_02338;Tha_02713;Tha_02726;Tha_03142;Tha_03413;Tha_03603;Tha_04284;Tha_04450;Tha_05518;Tha_05560;Tha_06097;Tha_06152;Tha_06170;Tha_06296;Tha_06513;Tha_06933;Tha_07300;Tha_07771;Tha_08032;Tha_09027;Tha_09284;Tha_09503;Tha_09891;Tha_10349;
M:Cell wall/membrane/envelope biogenesis	17	Tha_00668;Tha_01062;Tha_01321;Tha_01354;Tha_02641;Tha_02985;Tha_03066;Tha_04033;Tha_04857;Tha_05337;Tha_06591;Tha_06960;Tha_07875;Tha_08337;Tha_09568;Tha_09870;Tha_09960;
Z:Cytoskeleton	11	Tha_00530;Tha_02726;Tha_03342;Tha_03410;Tha_03527;Tha_05595;Tha_06097;Tha_07683;Tha_08032;Tha_08201;Tha_08365;
W:Extracellular structures	2	Tha_00668;Tha_06591;
U:Intracellular trafficking; secretion; and vesicular transport	7	Tha_00271;Tha_03410;Tha_03603;Tha_05442;Tha_05518;Tha_05940;Tha_08449;
O:Posttranslational modification; protein turnover; chaperones	44	Tha_00273;Tha_00375;Tha_00580;Tha_00717;Tha_01013;Tha_01024;Tha_01064;Tha_01104;Tha_01324;Tha_01426;Tha_01455;Tha_01764;Tha_02343;Tha_02429;Tha_02540;Tha_03036;Tha_03633;Tha_03676;Tha_03947;Tha_03999;Tha_04356;Tha_04399;Tha_04626;Tha_05328;Tha_05805;Tha_05885;Tha_05984;Tha_06226;Tha_06366;Tha_06441;Tha_06661;Tha_06960;Tha_07890;Tha_08511;Tha_08955;Tha_09143;Tha_09258;Tha_09432;Tha_09723;Tha_10021…
C:Energy production and conversion	43	Tha_00484;Tha_00576;Tha_00596;Tha_00605;Tha_00609;Tha_00612;Tha_01316;Tha_01804;Tha_02076;Tha_02213;Tha_02219;Tha_02337;Tha_02598;Tha_02605;Tha_02690;Tha_02843;Tha_02946;Tha_03374;Tha_03926;Tha_04235;Tha_04300;Tha_04540;Tha_04566;Tha_04795;Tha_05862;Tha_06000;Tha_06040;Tha_06442;Tha_06996;Tha_07037;Tha_07054;Tha_07277;Tha_07337;Tha_07361;Tha_08147;Tha_08314;Tha_08680;Tha_09100;Tha_09416;Tha_09616…
E:Amino acid transport and metabolism	33	Tha_00217;Tha_00681;Tha_01758;Tha_02467;Tha_02475;Tha_02625;Tha_02749;Tha_02869;Tha_03633;Tha_03962;Tha_04382;Tha_04479;Tha_04514;Tha_04583;Tha_04910;Tha_04984;Tha_05171;Tha_05379;Tha_05419;Tha_05675;Tha_05868;Tha_06388;Tha_06612;Tha_07041;Tha_07330;Tha_07689;Tha_07975;Tha_08535;Tha_09888;Tha_10067;Tha_10074;Tha_10087;Tha_10365;
F:Nucleotide transport and metabolism	11	Tha_02375;Tha_03116;Tha_03789;Tha_04119;Tha_04366;Tha_04888;Tha_05268;Tha_06803;Tha_09224;Tha_09314;Tha_10091;
G:Carbohydrate transport and metabolism	38	Tha_00463;Tha_00907;Tha_01062;Tha_01426;Tha_01695;Tha_02105;Tha_02310;Tha_02342;Tha_02528;Tha_02829;Tha_02948;Tha_02971;Tha_02985;Tha_03411;Tha_03621;Tha_03991;Tha_04063;Tha_04325;Tha_04856;Tha_05551;Tha_05922;Tha_06388;Tha_06554;Tha_06614;Tha_07054;Tha_07388;Tha_07411;Tha_07876;Tha_08163;Tha_08267;Tha_09207;Tha_09643;Tha_09882;Tha_10329;Tha_10382;Tha_10433;Tha_10750;Tha_10801;
H:Coenzyme transport and metabolism	2	Tha_05268;Tha_06610;
I:Lipid metabolism	36	Tha_00493;Tha_00613;Tha_00716;Tha_01095;Tha_01559;Tha_01674;Tha_01745;Tha_02093;Tha_02280;Tha_02338;Tha_03241;Tha_03413;Tha_04257;Tha_04284;Tha_04513;Tha_05169;Tha_05808;Tha_06029;Tha_06227;Tha_06257;Tha_06350;Tha_06400;Tha_06589;Tha_06760;Tha_06778;Tha_06969;Tha_07062;Tha_07106;Tha_07348;Tha_08149;Tha_08298;Tha_09435;Tha_09752;Tha_09966;Tha_10043;Tha_10349;
Q:Secondary metabolites biosynthesis; transport and catabolism	71	Tha_00267;Tha_00693;Tha_00697;Tha_00758;Tha_00956;Tha_01035;Tha_01095;Tha_01224;Tha_01865;Tha_02261;Tha_02280;Tha_02377;Tha_02972;Tha_02973;Tha_03401;Tha_03422;Tha_03734;Tha_03788;Tha_03923;Tha_04039;Tha_04056;Tha_04221;Tha_04231;Tha_04283;Tha_04315;Tha_04325;Tha_04357;Tha_04513;Tha_04724;Tha_05168;Tha_05187;Tha_05677;Tha_05806;Tha_05808;Tha_05809;Tha_05955;Tha_05988;Tha_06017;Tha_06102;Tha_06160…
P:Inorganic ion transport and metabolism	19	Tha_00054;Tha_00070;Tha_01035;Tha_02211;Tha_02377;Tha_02844;Tha_04462;Tha_04463;Tha_06171;Tha_06544;Tha_07052;Tha_07181;Tha_07321;Tha_07368;Tha_08778;Tha_09353;Tha_10091;Tha_10326;Tha_10404;
R:General function prediction only	105	Tha_00189;Tha_00210;Tha_00225;Tha_00304;Tha_00484;Tha_00564;Tha_00576;Tha_00609;Tha_00610;Tha_00612;Tha_00727;Tha_00781;Tha_01316;Tha_01457;Tha_01665;Tha_01944;Tha_01996;Tha_02219;Tha_02300;Tha_02336;Tha_02370;Tha_02461;Tha_02572;Tha_02630;Tha_02631;Tha_02841;Tha_02843;Tha_02947;Tha_03255;Tha_03374;Tha_03699;Tha_03846;Tha_03893;Tha_04040;Tha_04054;Tha_04143;Tha_04157;Tha_04235;Tha_04257;Tha_04505…
S:Function unknown	10	Tha_00195;Tha_02596;Tha_03643;Tha_04285;Tha_04573;Tha_06332;Tha_07470;Tha_07907;Tha_09394;Tha_09953;

## Sheet: S6 Table
gene_id	th_33_FPKM	1_1_FPKM	log2(fold_change) (1_1_VS_th_33)	p_value	annotation
Tha_04325	0	7.90972	inf	5e-05	glycoside hydrolase family
Tha_05177	101.803	10.238	-3.31376	0.00475	glycoside hydrolase family
Tha_03076	7.82958	0	#NAME?	0.00135	glycoside hydrolase family
Tha_04461	676.622	89.3668	-2.92054	0.007	glycoside hydrolase family
Tha_00463	37.532	9.41319	-1.99536	0.0398	glycoside hydrolase family
Tha_03243	130.538	18.735	-2.80067	0.00855	glycoside hydrolase family
Tha_02239	159.698	22.9722	-2.79738	0.0216	glycoside hydrolase family
Tha_06592	417.914	35.7984	-3.54524	0.00165	glycoside hydrolase family
Tha_01536	15.2356	70.0037	2.19999	0.03915	glycoside hydrolase family
Tha_08365	38.2848	235.873	2.62317	0.01785	glycoside hydrolase family
Tha_00478	534.773	98.7781	-2.43666	0.03185	glycoside hydrolase family
Tha_01695	11.6312	78.1812	2.74882	0.0187	glycoside hydrolase family
Tha_02175	2.78535	0	#NAME?	0.0149	glycoside hydrolase family
Tha_10025	2.27453	0	#NAME?	0.0054	glycoside hydrolase family
Tha_06851	2.66789	0	#NAME?	0.00545	glycoside hydrolase family
Tha_10297	544.407	26.365	-4.36799	0.0046	glycoside hydrolase family
Tha_02105	46.73	10.0042	-2.22374	0.03575	glycoside hydrolase family
Tha_02528	164.086	7.04885	-4.54092	0.00125	glycoside hydrolase family
Tha_00960	26.0041	0.60855	-5.41722	0.03035	glycoside hydrolase family
Tha_10278	217.3	19.6692	-3.46568	0.003	glycoside hydrolase family
Tha_03032	2.72596	0	#NAME?	0.0046	glycoside hydrolase family
Tha_01184	198.796	11.7792	-4.07697	0.00235	glycoside hydrolase family
Tha_01624	268.898	39.617	-2.76287	0.0168	glycoside hydrolase family
Tha_09384	66.5566	15.4174	-2.11002	0.03065	glycoside hydrolase family
Tha_07199	562.633	21.3261	-4.7215	0.0002	glycoside hydrolase family
Tha_03621	18.8722	3.8399	-2.29712	0.03785	glycoside hydrolase family
Tha_07952	4.10446	0	#NAME?	0.0046	glycoside hydrolase family
Tha_07042	3.66779	0	#NAME?	5e-05	glycoside hydrolase family
Tha_05990	5.81862	29.855	2.35922	0.0333	glycoside hydrolase family
Tha_02055	4.34383	359.718	6.37175	0.00565	glycoside hydrolase family
Tha_07054	42.1301	1.15307	-5.1913	0.02365	glycosyltransferase family
Tha_00857	151.192	11.4363	-3.72469	0.0012	glycosyltransferase family
Tha_06593	448.738	23.9323	-4.22884	0.00765	glycosyltransferase family
Tha_04857	160.271	1299.58	3.01947	0.0232	glycosyltransferase family
Tha_10211	49.0041	234.627	2.25939	0.0449	glycosyltransferase family
Tha_02985	0	1.72088	inf	0.0085	glycosyltransferase family
Tha_10801	541.189	54.5416	-3.3107	0.00165	glycosyltransferase family
Tha_00699	3.26818	0	#NAME?	0.006	carbohydrate esterase family
Tha_02146	25.4029	1.2067	-4.39585	0.03115	carbohydrate esterase family
Tha_02343	1.7593	0	#NAME?	0.0149	carbohydrate esterase family
Tha_03947	2.17779	80.1723	5.20216	0.02265	carbohydrate esterase family
Tha_05475	3.18119	56.1058	4.14051	0.01555	carbohydrate esterase family
Tha_05805	19.3523	2.45039	-2.98142	0.04515	carbohydrate esterase family
Tha_09258	137.433	25.5894	-2.42511	0.0335	carbohydrate esterase family
Tha_09284	327.324	16.374	-4.32124	0.0006	carbohydrate esterase family
Tha_02928	8.16302	76.1564	3.22179	0.00655	carbohydrate esterase family
Tha_03036	26.6804	251.139	3.23464	0.005	carbohydrate esterase family
Tha_04453	49.0798	249.778	2.34744	0.03775	carbohydrate esterase family
Tha_07769	5.31136	29.5689	2.47693	0.02345	carbohydrate esterase family
Tha_06701	5.9222	41.085	2.79441	0.01085	carbohydrate esterase family
Tha_01324	110.115	26.4785	-2.05612	0.0327	carbohydrate-binding module family
Tha_01704	78.2419	6.75166	-3.53463	0.00335	carbohydrate-binding module family
Tha_02079	2.85165	163.739	5.84345	0.00705	auxiliary activities family
Tha_04054	74.8526	4.15163	-4.1723	0.0008	auxiliary activities family
Tha_07466	444.672	13.5057	-5.0411	0.00015	auxiliary activities family
Tha_07753	18.8392	3.91325	-2.2673	0.0372	auxiliary activities family
Tha_10013	2.50787	0	#NAME?	0.0028	auxiliary activities family
Tha_07399	1.00993	16.9461	4.06863	0.0296	auxiliary activities family
Tha_07417	8.5534	32.5663	1.92881	0.0437	auxiliary activities family
Tha_01426	448.86	64.7675	-2.79292	0.0339	auxiliary activities family
Tha_00564	245.861	6.32401	-5.28086	0.01415	auxiliary activities family
Tha_10715	15.4323	87.3385	2.50066	0.02255	auxiliary activities family
Tha_03353	1.87546	0	#NAME?	0.0054	auxiliary activities family
Tha_00596	0	10.8994	inf	5e-05	auxiliary activities family
Tha_00605	3.03445	1116.45	8.52327	0.0024	auxiliary activities family
Tha_02690	16.6838	310.959	4.2202	0.0003	auxiliary activities family

## Sheet: S7 Table
Gene_ID	TF Family Name	th_33_FPKM	1_1_FPKM	log2(fold_change) (1_1_VS_th_33)	p_value
Tha_09974	C2H2 zinc finger	31.3892	1.65971	-4.24126	0.029
Tha_03728	C2H2 zinc finger	11.6644	0.867889	-3.74846	0.0286
Tha_04707	C2H2 zinc finger	83.3884	6.86975	-3.60152	0.00325
Tha_05507	C2H2 zinc finger	23.1795	2.57631	-3.16947	0.04695
Tha_01888	C2H2 zinc finger	142.429	18.9072	-2.91324	0.0066
Tha_01571	C2H2 zinc finger	52.1942	8.22342	-2.66608	0.0181
Tha_02013	C2H2 zinc finger	133.729	34.7566	-1.94395	0.0446
Tha_02785	C2H2 zinc finger	31.3333	123.01	1.97301	0.0325
Tha_04148	C2H2 zinc finger	17.3348	96.5133	2.47706	0.0304
Tha_06613	Zn2Cys6	785.444	11.3096	-6.11789	0.00035
Tha_01436	Zn2Cys6	94.9693	3.99328	-4.57182	0.0107
Tha_08349	Zn2Cys6	10.0824	0.483645	-4.38175	0.03125
Tha_02982	Zn2Cys6	22.118	2.68682	-3.04125	0.0449
Tha_10670	Zn2Cys6	9.46299	43.0961	2.18719	0.0247
Tha_02689	Zn2Cys6	17.23	91.8878	2.41496	0.0129
Tha_00391	Zn2Cys6	61.0669	331.56	2.44081	0.02085
Tha_02606	Zn2Cys6	9.83339	59.8831	2.60639	0.01855
Tha_08548	Zn2Cys6	6.26206	57.086	3.18843	0.00615
Tha_10000	Zn2Cys6	14.4529	153.956	3.41308	0.0021
Tha_09854	Zn2Cys6	0.91103	12.7429	3.80605	0.0408
Tha_00656	Zn2Cys6	6.45186	90.2922	3.80681	0.0024
Tha_07967	Zn2Cys6	3.39361	94.9765	4.80668	0.01275
Tha_06040	Zn2Cys6	1.53785	48.6233	4.98266	0.0137
Tha_01735	Zn2Cys6	3.13786	0	#NAME?	0.00135
Tha_07706	HMG	99.3474	17.3031	-2.52146	0.01815
Tha_01457	Homeobox	4.42224	0	#NAME?	5e-05
Tha_06892	Homeobox	2.1066	0	#NAME?	0.006
Tha_01759	Myb	301.254	20.3385	-3.8887	0.0032
Tha_07029	Winged helix repressor DNA-binding	632.133	113.937	-2.47199	0.02045

## Sheet: S8 Table
gene_id	th_33_FPKM	1_1_FPKM	log2(fold_change) (1_1_VS_th_33)	p_value	KOG
Tha_04357	117.191	23.503	-2.31794	0.0417	1-Acyl dihydroxyacetone phosphate reductase and related dehydrogenases
Tha_00697	0	1.89784	inf	0.0085	Alcohol dehydrogenase class V
Tha_06102	2.73731	24.5151	3.16284	0.04355	Alcohol dehydrogenase class V
Tha_10275	363.069	51.0057	-2.83151	0.0133	Alcohol dehydrogenase class V
Tha_00267	107.256	16.6323	-2.68899	0.01175	Amine oxidase
Tha_04039	9.61287	121.958	3.66527	0.00075	Amine oxidase
Tha_05187	22.5966	2.79429	-3.01555	0.04395	Amine oxidase
Tha_03788	468.471	6.78884	-6.10865	0.0009	Copper amine oxidase
Tha_04283	169.955	22.1625	-2.93896	0.01255	Copper amine oxidase
Tha_02261	10.4062	95.597	3.19952	0.00295	Cytochrome P450
Tha_00693	118.938	12.818	-3.21397	0.0038	Cytochrome P450 CYP2 subfamily
Tha_01865	18.0109	2.21628	-3.02266	0.048	Cytochrome P450 CYP2 subfamily
Tha_04221	118.695	814.392	2.77847	0.0373	Cytochrome P450 CYP2 subfamily
Tha_05677	114.63	0	#NAME?	5e-05	Cytochrome P450 CYP2 subfamily
Tha_05809	144.553	32.0697	-2.17231	0.02355	Cytochrome P450 CYP2 subfamily
Tha_01224	387.761	74.7512	-2.375	0.0305	Cytochrome P450 CYP3/CYP5/CYP6/CYP9 subfamilies
Tha_01095	1.44174	45.3004	4.97364	0.0236	Cytochrome P450 CYP4/CYP19/CYP26 subfamilies
Tha_02280	373.852	66.2339	-2.49683	0.0259	Cytochrome P450 CYP4/CYP19/CYP26 subfamilies
Tha_04513	3.86599	24.994	2.69267	0.0208	Cytochrome P450 CYP4/CYP19/CYP26 subfamilies
Tha_05808	259.546	25.8081	-3.3301	0.0054	Cytochrome P450 CYP4/CYP19/CYP26 subfamilies
Tha_06589	74.9903	9.2755	-3.01521	0.0162	Cytochrome P450 CYP4/CYP19/CYP26 subfamilies
Tha_06778	83.1433	7.96739	-3.38342	0.00835	Cytochrome P450 CYP4/CYP19/CYP26 subfamilies
Tha_06969	7.17522	45.0215	2.64952	0.0184	Cytochrome P450 CYP4/CYP19/CYP26 subfamilies
Tha_08298	180.858	37.9017	-2.25452	0.0176	Cytochrome P450 CYP4/CYP19/CYP26 subfamilies
Tha_09435	231.037	54.64	-2.08009	0.0476	Cytochrome P450 CYP4/CYP19/CYP26 subfamilies
Tha_10043	15.7756	0.896998	-4.13645	0.03235	Cytochrome P450 CYP4/CYP19/CYP26 subfamilies
Tha_03734	8.70609	111.633	3.6806	0.0017	Dehydrogenases with different specificities
Tha_03923	88.2807	696.434	2.97982	0.0334	Dehydrogenases with different specificities
Tha_05806	486.101	48.6421	-3.32098	0.00325	Dehydrogenases with different specificities
Tha_05988	0	3.90557	inf	0.0044	Dehydrogenases with different specificities
Tha_06017	0	2.64827	inf	0.0085	Dehydrogenases with different specificities
Tha_06365	2.81714	0	#NAME?	0.0078	Dehydrogenases with different specificities
Tha_06735	22.4573	1520.77	6.08147	0.0005	Dehydrogenases with different specificities
Tha_06826	0	1.92495	inf	0.01115	Dehydrogenases with different specificities
Tha_07454	6.09028	74.8059	3.61857	0.02445	Dehydrogenases with different specificities
Tha_08262	41.5851	489.765	3.55795	0.0026	Dehydrogenases with different specificities
Tha_08550	2.07815	0	#NAME?	0.00885	Dehydrogenases with different specificities
Tha_08585	3.35606	161.119	5.58521	0.0077	Dehydrogenases with different specificities
Tha_08779	61.016	289.918	2.24838	0.0449	Dehydrogenases with different specificities
Tha_08943	8.94995	43.7334	2.28878	0.0347	Dehydrogenases with different specificities
Tha_10156	9.24835	132.81	3.84402	0.0025	Dehydrogenases with different specificities
Tha_04325	0	7.90972	inf	5e-05	Dimeric dihydrodiol dehydrogenase
Tha_10433	48.0103	8.93637	-2.42558	0.0346	Dimeric dihydrodiol dehydrogenase
Tha_01035	65.3484	12.0819	-2.43531	0.03555	Ferric reductase NADH/NADPH oxidase and related proteins
Tha_02377	236.309	20.8883	-3.4999	0.00255	Ferric reductase NADH/NADPH oxidase and related proteins
Tha_06171	51.5623	6.03404	-3.09512	0.0096	Ferric reductase NADH/NADPH oxidase and related proteins
Tha_06544	8.77112	51.1037	2.54259	0.0173	Ferric reductase NADH/NADPH oxidase and related proteins
Tha_00758	377.236	47.8402	-2.97917	0.0068	Flavin-containing monooxygenase
Tha_00956	5.567	25.3547	2.18728	0.04905	Flavin-containing monooxygenase
Tha_03401	63.3051	11.8858	-2.41309	0.0254	Flavin-containing monooxygenase
Tha_04231	18.2881	2.18549	-3.06488	0.04335	Flavin-containing monooxygenase
Tha_05168	0	2.78022	inf	0.004	Flavin-containing monooxygenase
Tha_06160	1.15941	21.2245	4.19426	0.02775	Flavin-containing monooxygenase
Tha_09383	34.0489	7.66068	-2.15207	0.04495	Hydroxysteroid 17-beta dehydrogenase 11
Tha_10343	2.91603	94.3819	5.01643	0.02885	Hydroxysteroid 17-beta dehydrogenase 11
Tha_10535	569.775	18.3566	-4.95602	0.00035	Iron/ascorbate family oxidoreductases
Tha_04056	2.15162	0	#NAME?	0.0041	Multicopper oxidases
Tha_02972	19.9303	0	#NAME?	5e-05	Multidrug resistance-associated protein/mitoxantrone resistance protein ABC superfamily
Tha_02973	29.382	0.618938	-5.569	0.0163	Multidrug resistance-associated protein/mitoxantrone resistance protein ABC superfamily
Tha_04724	6.39685	46.5475	2.86327	0.0068	Multidrug resistance-associated protein/mitoxantrone resistance protein ABC superfamily
Tha_07244	0.65255	7.56641	3.53545	0.0305	Multidrug resistance-associated protein/mitoxantrone resistance protein ABC superfamily
Tha_09965	7.81124	32.9112	2.07496	0.03125	Multidrug resistance-associated protein/mitoxantrone resistance protein ABC superfamily
Tha_10041	48.3248	2.13924	-4.49759	0.00055	Multidrug resistance-associated protein/mitoxantrone resistance protein ABC superfamily
Tha_10047	3.73347	0.405899	-3.20133	0.00935	Non-ribosomal peptide synthetase/alpha-aminoadipate reductase and related enzymes
Tha_03422	1.15456	11.9857	3.3759	0.02955	Pleiotropic drug resistance proteins (PDR1-15) ABC superfamily
Tha_04315	51.4347	320.352	2.63885	0.0425	Pleiotropic drug resistance proteins (PDR1-15) ABC superfamily
Tha_05955	1.7567	22.4668	3.67686	0.0422	Predicted dehydrogenase
Tha_07464	415.282	40.0852	-3.37295	0.00775	Predicted dehydrogenase
Tha_10168	10.9868	728.858	6.05179	5e-05	Predicted dehydrogenase
Tha_10324	35.1126	6.77448	-2.37381	0.0254	Predicted dehydrogenase
Tha_07273	1.78086	17.4467	3.29231	0.0376	Transporter ABC superfamily
